# Supplementary material for: The reliability of SARS-CoV-2 IgG antibody testing – a pilot study in asymptomatic health care workers in a Croatian university hospital
Source: PubMed Central journal article supplement (PMC7821371; doi:10.3325/cmj.2020.61.485), 2020-12
Supplement: CroatMedJ_61_s007.pdf [file CroatMedJ_61_s007.pdf]

**Supplementary table 1.** Distribution of study participants according to hospital department (N=1678)

| Hospital department/ward                                           | N (%)      |
|--------------------------------------------------------------------|------------|
| Department of Gynecology and Obstetrics                            | 276 (16.4) |
| Department of Anesthesiology and Intensive Care Unit               | 221 (13.2) |
| Department of Internal Medicine                                    | 179 (10.7) |
| Division of Gastroenterology and Hepatology                        | 62         |
| Internal Intensive Care Unit                                       | 58         |
| Division of Nephrology, Hypertension, Dialysis and Transplantation | 43         |
| Division of Clinical Immunology and Rheumatology                   | 16         |
| Department of Laboratory Diagnostics                               | 164 (9.8)  |
| Department of Cardiovascular Diseases                              | 158 (9.4)  |
| Department of Oncology and Radiotherapy                            | 119 (7.1)  |
| Department of Emergency Medicine                                   | 99 (5.9)   |

|                                                                                       |            |
|---------------------------------------------------------------------------------------|------------|
| Department of Otolaryngology, Head and Neck Surgery                                   | 93 (5.5)   |
| Department of Neurology                                                               | 38 (2.3)   |
| Department for Respiratory Diseases                                                   | 35 (2.1)   |
| Department of Orthopedic Surgery                                                      | 30 (1.8)   |
| Department of Dental Medicine                                                         | 15 (0.9)   |
| Department of Rheumatology and Rehabilitation                                         | 15 (0.9)   |
| Other departments*                                                                    | 61 (3.6)   |
| Hospital administration, technical support, support staff and cleaning services staff | 176 (10.4) |

\*Other departments included in the study in minor proportion (N): Department of Clinical Transfusiology (14), Department of Pathology and Cytology (11), Department of Surgery (10), Department of Dermatovenereology (9), Department of Radiology (8), Department of Urology (5), Department of Pediatrics (4).
