# Supplementary material for: The reliability of SARS-CoV-2 IgG antibody testing – a pilot study in asymptomatic health care workers in a Croatian university hospital
Source: PubMed Central journal article supplement (PMC7821371; doi:10.3325/cmj.2020.61.485), 2020-12
Supplement: CroatMedJ_61_s008.pdf [file CroatMedJ_61_s008.pdf]

**Supplementary table 2.** Distribution of hospital personnel included in the study per working position

| Healthcare staff participants          | N (%)      |
|----------------------------------------|------------|
| -                                      |            |
| - Nurses and nursing assistants        | 801 (47.8) |
| - Medical doctors                      | 366 (21.8) |
| - Laboratory technicians               | 124 (7.4)  |
| - Midwives                             | 76 (4.6)   |
| - Medical biochemists and biologists   | 52 (3.1)   |
| - Radiologic technicians               | 51 (3.0)   |
| - Physiotherapists                     | 17 (1.0)   |
| - Dentists and dental assistants       | 15 (0.9)   |
| Non-healthcare staff participants      |            |
| -                                      |            |
| - Cleaning staff                       | 64 (3.8)   |
| - Support staff                        | 51 (3.0)   |
| - Administrative staff                 | 49 (2.9)   |
| - Technical support and security staff | 12 (0.7)   |
